# Supplementary material for: Methane conversion and hydrogen production over TiO2/WO3/Pt heterojunction photocatalysts
Source: Royal Society of Chemistry journal article supplement (doi:10.1039/d3ma00844d), 2023-11-27
Supplement: d3ma00844d1.pdf [file d3ma00844d1.pdf]

## Supplementary Information

### **Methane Conversion and Hydrogen Production over TiO<sub>2</sub>/WO<sub>3</sub>/Pt heterojunction photocatalysts**

Saulo Amaral Carminati,<sup>\*a</sup> Eliane Ribeiro Januário,<sup>a</sup> Arthur Pignataro Machado,<sup>b</sup> Patrícia Ferreira Silvaino,<sup>a</sup> Jorge Moreira Vaz,<sup>a</sup> Estevam Vitorio Spinacé<sup>\*a</sup>

a Instituto de Pesquisas Energéticas e Nucleares, IPEN-CNEN/SP, Av. Prof. Lineu Prestes, 2242-Cidade Universitária, São Paulo, 05508-000, Brazil.

b Laboratório de Nanotecnologia e Energia Solar, Instituto de Química, Universidade Estadual de Campinas, Campinas, 13083-970, SP, Brazil.

\* Corresponding authors:

Dr. Saulo Amaral Carminati

Dr. Estevam Vitorio Spinacé

Instituto de Pesquisas Energéticas e Nucleares- IPEN-CNEN/SP

Av. Prof. Lineu Prestes, 2242 – Cidade Universitária

05508-900 São Paulo – SP

Brazil

Tel.: +55-11-2810-5666

e-mail: [saulocarminati89@gmail.com](mailto:saulocarminati89@gmail.com) ; [espinace@ipen.br](mailto:espinace@ipen.br)

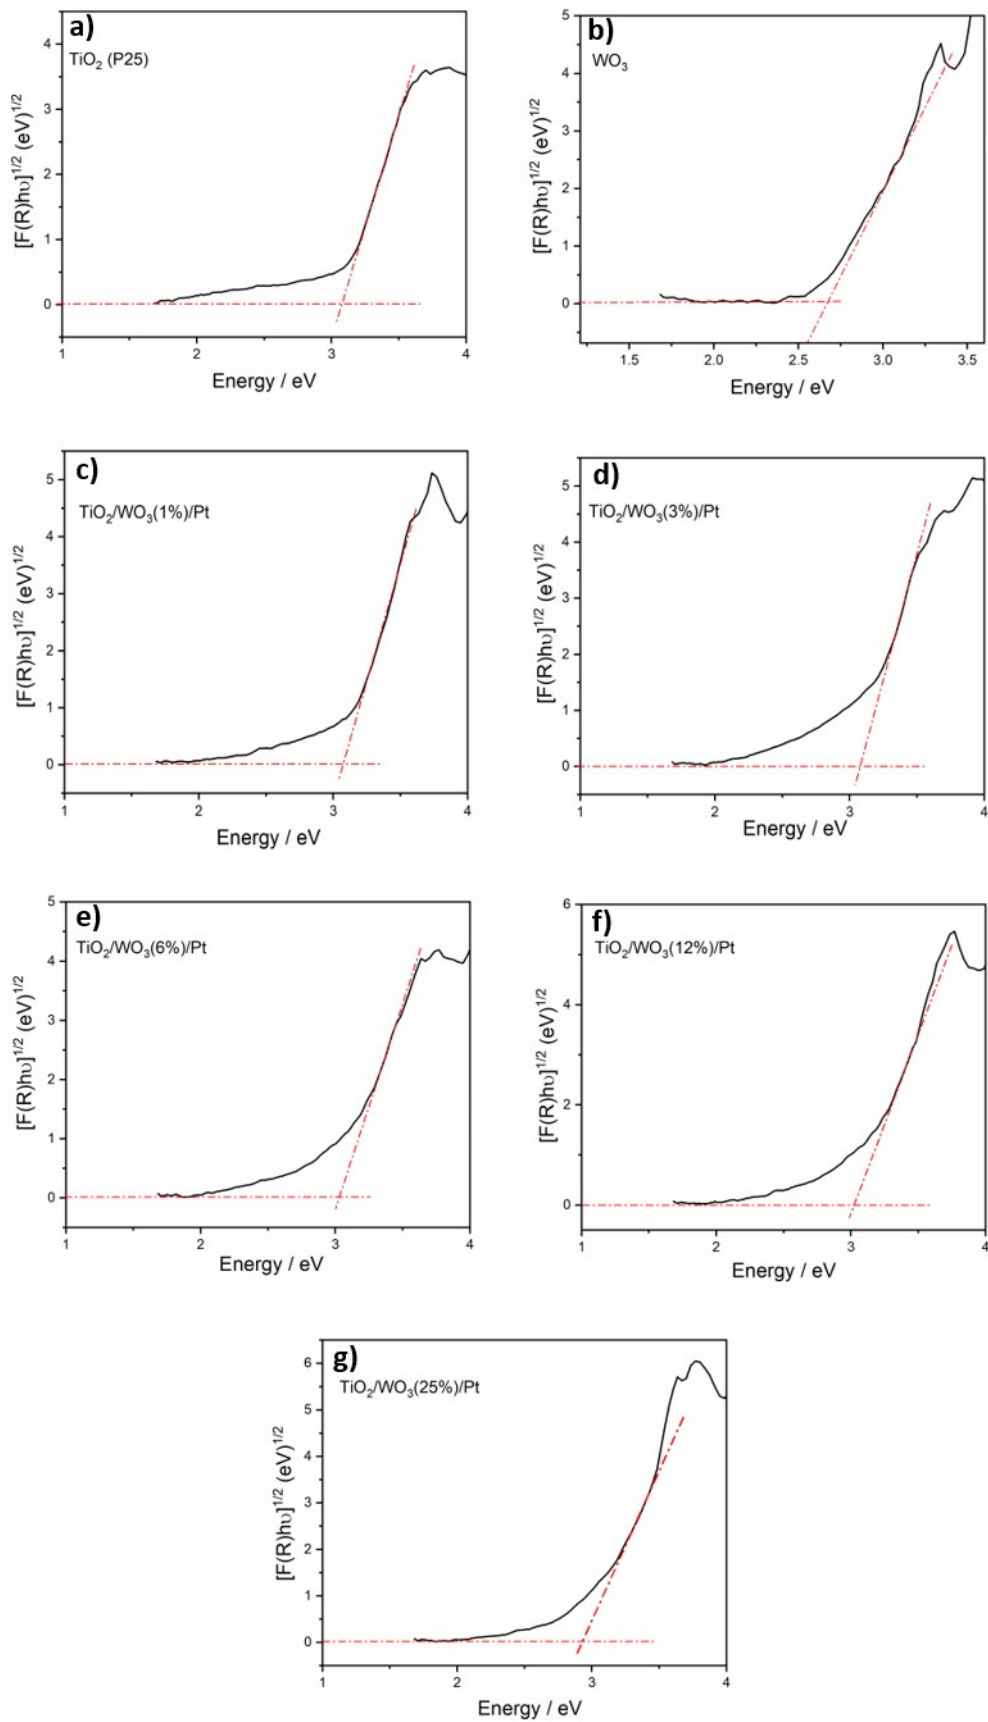

**Figure S1:** Kubelka–Munk plots of TiO<sub>2</sub> (P25), WO<sub>3</sub> and TiO<sub>2</sub>/WO<sub>3</sub>/Pt-based photocatalysts.

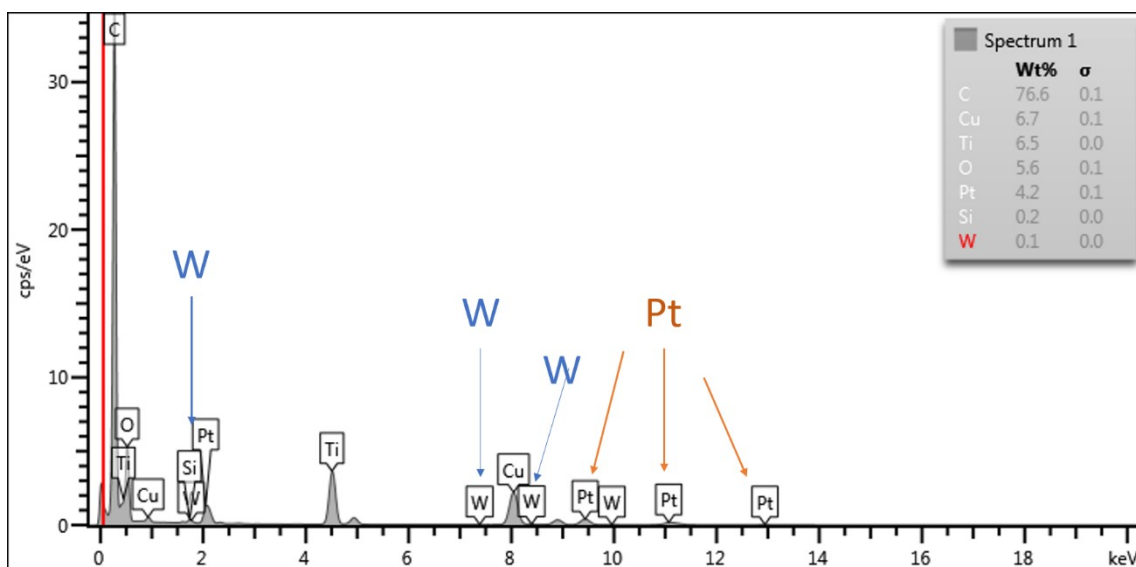

**Figure S2:** EDX spectrum image of TiO<sub>2</sub>/WO<sub>3</sub>/Pt material.

**Table S1:** Band gap values (eV) of the photocatalysts, determined by Kubelka Munk plots.

| Photocatalyst                              | Band gap ( $E_g$ ) value (eV) |
|--------------------------------------------|-------------------------------|
| TiO <sub>2</sub> (P25)                     | 3.10                          |
| WO <sub>3</sub>                            | 2.68                          |
| TiO <sub>2</sub> /WO <sub>3</sub> (1%)/Pt  | 3.07                          |
| TiO <sub>2</sub> /WO <sub>3</sub> (3%)/Pt  | 3.08                          |
| TiO <sub>2</sub> /WO <sub>3</sub> (6%)/Pt  | 3.03                          |
| TiO <sub>2</sub> /WO <sub>3</sub> (12%)/Pt | 3.02                          |
| TiO <sub>2</sub> /WO <sub>3</sub> (25%)/Pt | 2.93                          |

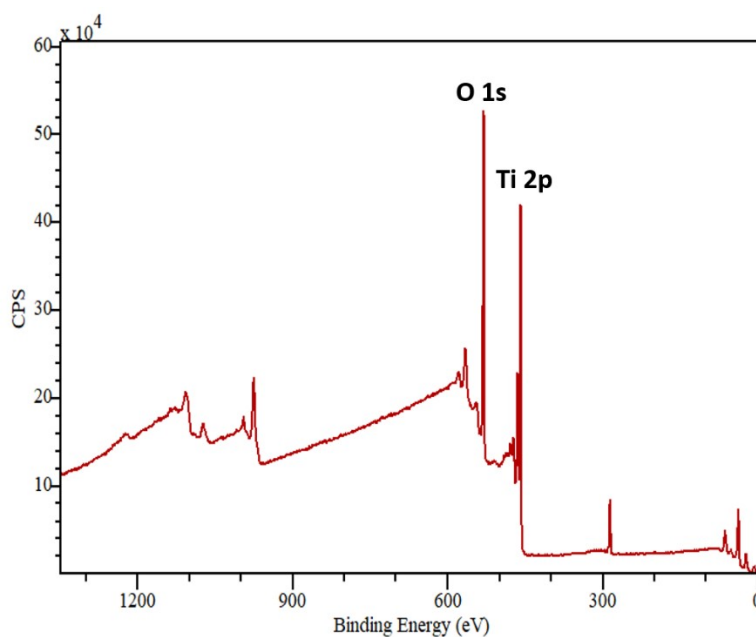

**Figure S3:** XPS survey Al K $\alpha$  photoelectron spectrum of TiO<sub>2</sub> (P25).
